# Supplementary material for: Spatial variations and macroeconomic determinants of life expectancy and mortality rate in China: a county-level study based on spatial analysis models
Source: Springer Nature journal article supplement (doi:10.1007/s00038-019-01251-y), 2019-05-21
Supplement: MOESM1 [file 16738186]

**International Journal of Public Health**

**Spatial variations and macroeconomic determinants of life expectancy and mortality rate in China: A county-level study based on spatial analysis models**

**S-Table 1. Summary of descriptive statistical parameters with sexual difference of LEB, CMR, U5MR, and IMR at county level in China in 2010**

| Indexes | | Mean value | SD | *N* |
| --- | --- | --- | --- | --- |
| LEB  (years) | Total | 77.31 | 4.97 | 2130 |
| Male | 74.93 | 5.00 |
| Female | 80.46 | 5.27 |
| CMR  (per 1,000 people) | Total | 5.68 | 1.69 | 2127 |
| Male | 6.42 | 1.86 |
| Female | 4.92 | 1.81 |
| U5MR  (per 1,000 births) | Total | 9.59 | 13.05 | 2128 |
| Male | 9.92 | 13.15 |
| Female | 9.29 | 14.02 |
| IMR  (per 1,000 births) | Total | 5.87 | 8.61 | 2128 |
| Male | 5.94 | 8.37 |
| Female | 5.85 | 9.81 |

Notes:

LEB: Life expectancy at birth; CMR: Crude mortality rate; IMR: Infant mortality rate; U5MR: Under-5 mortality rate;

**S-Table 2. Global spatial autocorrelations of LEB, CMR, U5MR and IMR at county level** **in China in 2010**

| Indexes | Moran's *I* | *Z* | *p*-value |
| --- | --- | --- | --- |
| LEB | 0.7895 | 63.0097 | 0.001 |
| CMR | 0.7206 | 57.2731 | 0.001 |
| U5MR | 0.5114 | 40.8985 | 0.001 |
| IMR | 0.4591 | 37.0539 | 0.001 |

Notes:

1) Contiguity weight: Queen Contiguity

2) LEB: Life expectancy at birth; CMR: Crude mortality rate; IMR: Infant mortality rate; U5MR: Under-5 mortality rate;

**S-Table 3 Comparison of major parameters of spatial lag model and ordinary least square in China in 2010**

| Models | Indexes | *R*-squared | AIC | Log likelihood |
| --- | --- | --- | --- | --- |
| Spatial lag model | LEB | 0.828179 | 20129.9 | -10047 |
| CMR | 0.762521 | 9591.92 | -4777.96 |
| U5MR | 0.453792 | 17577.3 | -8770.67 |
| IMR | 0.398492 | 15510 | -7737.02 |
| Ordinary least square | LEB | 0.498953 | 22341.7 | -11151.8 |
| CMR | 0.463924 | 10692.7 | -5327.34 |
| U5MR | 0.122716 | 18481.5 | -9221.74 |
| IMR | 0.127445 | 16207.8 | -8084.91 |

Notes:

1) AIC: Akaike Information Criterion, a relative measure of goodness of fit for statistical models.

2) Log likelihood: a measure of model fitting.
